# Supplementary material for: An ultrasensitive aptameric sensor for proteins based on hyperbranched rolling circle amplification
Source: Royal Society of Chemistry journal article supplement (doi:10.1039/c3cc45521a), 2013-01-01
Supplement: c3cc45521a.pdf [file c3cc45521a.pdf]

26 Millipore, resistance 18.2-M $\Omega$ ) was used throughout the experiments. DNA buffer  
27 solutions were prepared by dissolving DNA into 0.1 M pH 7.4 phosphate buffer  
28 solutions (PBS) containing 0.3 M NaCl.

### 29 **1.2 Ligation and RCA and HRCA Reaction**

30 Different concentrations of thrombin were mixed with aptamer probe (5 nM) by  
31 equal volume for 30 min. Then, the same volume of Primer 1 (5 nM) was introduced  
32 into above solution for incubation at 37 °C for 30 min with the vibration. The ligation  
33 reaction was performed in the ligation buffer solution containing 0.5 nM padlock  
34 probe, 6 U *E. coli* DNA ligase, 0.05% BSA and 0.167mM nicotinamide adenosine  
35 dinucleotides (NAD), which was incubated at 37 °C for 60 min<sup>1</sup>. For RCA reaction,  
36 the product of the ligation was incubated with a RCA reaction solution containing:  
37 1 $\times$ phi29 buffer phi29 DNAPolymerase (10 units/ $\mu$ L), 0.6 mM dNTP at 37 °C for 60  
38 min. While for HRCA reaction, the product of the ligation was added to a HRCA  
39 reaction solution containing 1 $\times$ polymerase buffer, 5 nM Primer 2, 0.6 mM dNTP and  
40 6.4 U Bst DNA polymerase at 37 °C for 60 min. These amplification reactions were  
41 terminated at 95 °C for 10 min. HRCA products were analyzed by 2% agarose gel  
42 electrophoresis containing 8 M urea and screened with a standard silver-staining  
43 method.

### 44 **1.3 Fluorescence Detection**

45 Above HRCA product and 4  $\mu$ L SYBR Green I were mixed and incubation at room  
46 temperature for 15 min. The fluorescence measurements were performed at room  
47 temperature on a Varian Cary Eclipse Fluorescence Spectrophotometer except  
48 specific indication. The emission spectra were collected from 505 to 595 nm with the  
49 excitation wavelength of 480 nm. Both the excitation and emission slit widths were  
50 set to 10.0 nm. The fluorescence intensity at 518 nm is used to quantitative analysis.

51

52

## 53 **2. Optimized of the reaction conditions**

54 In order to initiate HRCA reaction well, some reaction conditions are optimized.

55 dNTP plays an important role in strand extension. As shown in Figure S1(A), with  
56 the increment of dNTP concentration, the fluorescent intensity enhances gradually,  
57 and finally reaches a constant after 0.6 mM, indicating that SG dye embeds into  
58 HRCA production completely in the presence of 0.6 mM dNTP. Thus, the  
59 concentration of dNTP is 0.6 mM.

60 For the concentration of Bst DNA polymerase, it is found that 6.4 U of Bst DNA  
61 polymerase brings in a maximal fluorescent intensity in the range of 1.6~8U (shown  
62 in Figure S1(B)). Hence, the concentration of Bst DNA polymerase is set as 6.4 U.

63 The prime 2 is another important factor for the efficiency of HRCA. When the  
64 concentration of prime 2 exceeds 5 nM, the fluorescent intensity enhances very  
65 slowly, showing a maximum amplification efficiency of HRCA is achieved at the  
66 concentration of 5 nM. In this study, 5 nM prime 2 is used.

67 A long HRCA reaction time is expected to generate more copies of the circular  
68 template for better signal amplification. The time-dependent fluorescence is  
69 monitored the HRCA reaction. At the beginning, the fluorescent intensity boosts up  
70 gradually, showing that the HRCA production is generated continuously. While the  
71 fluorescent intensity trends to a constant value at 60 min, indicating the saturation of  
72 HRCA production. Therefore, 60 min is chosen as the optimum time for HRCA  
73 reaction.

74

## 75 **References**

76 1. Y. Q. Cheng, X. Zhang, Z. P. Li, X. X. Jiao, Y. C. Wang, *Angew. Chem. Int. Ed.*  
77 **2009**, *48*, 3268.

78

79

80

81

82

83 **Figure S1**

84

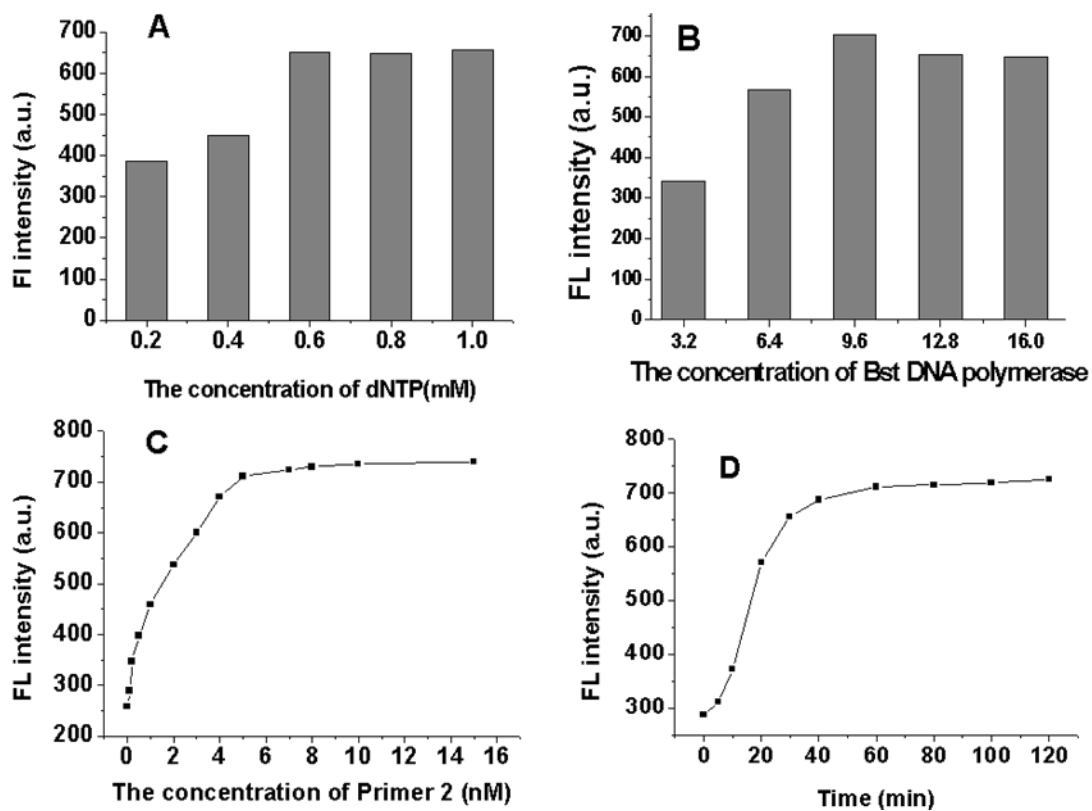

85

86

87 **Figure S1** A) Fluorescence intensity of this aptameric sensor upon the concentration  
88 of dNTP; B) Fluorescence intensity of this HRCA method upon the concentration of  
89 Bst DNA polymerase; C) Fluorescence intensity of this method upon the

90 concentration of Primer 2; D) Time-dependent fluorescence changes in HRCA

91 reaction.

92

93

94
